# Supplementary material
Source: PubMed Central journal article supplement (PMC14719)

A

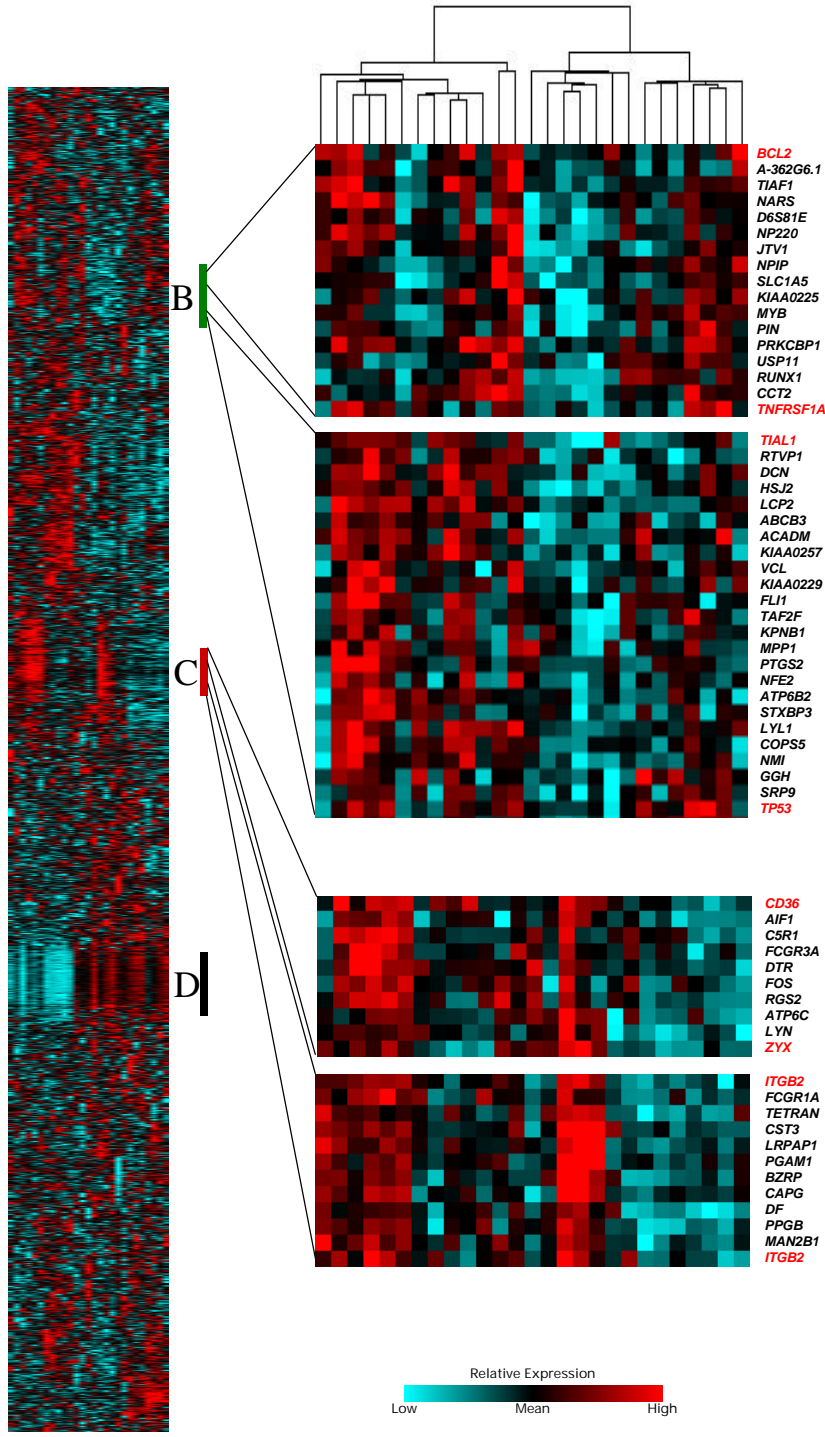

Supplement: pnas_98_3_1124__3.pdf [file pnas_98_3_1124__3.pdf]

A

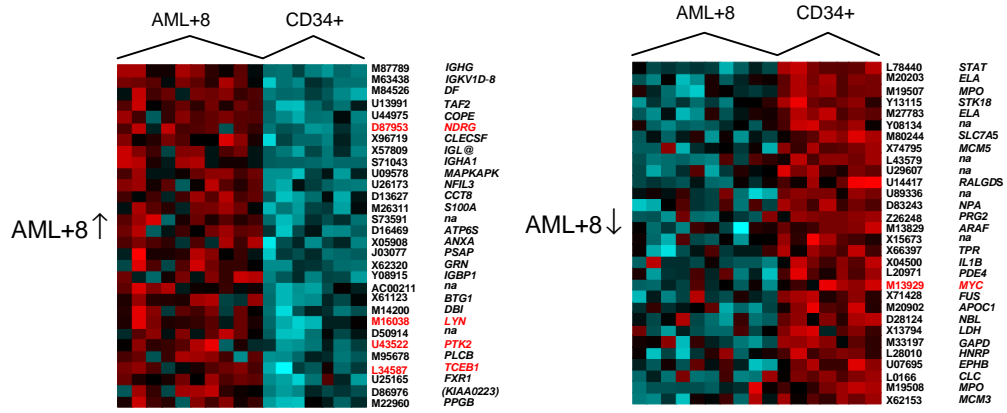

B

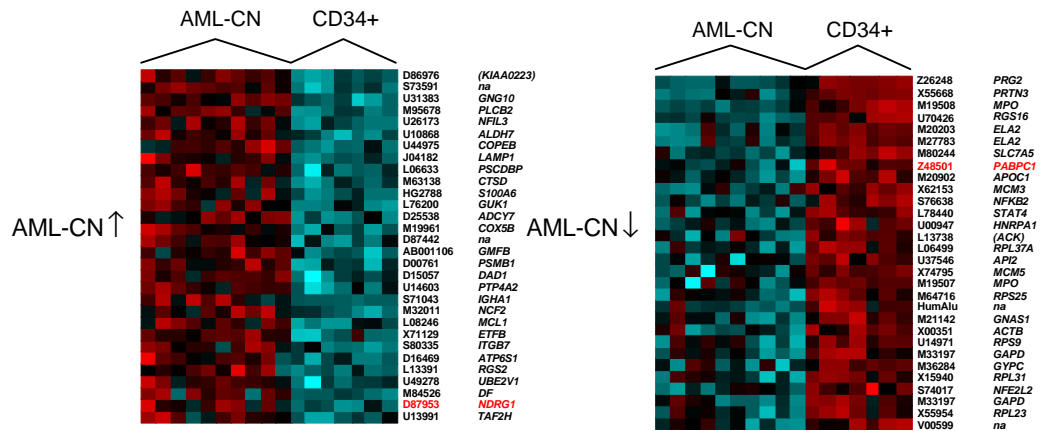

Normalized Expression

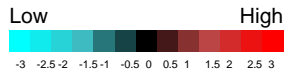

Supplement: pnas_98_3_1124__5.pdf [file pnas_98_3_1124__5.pdf]

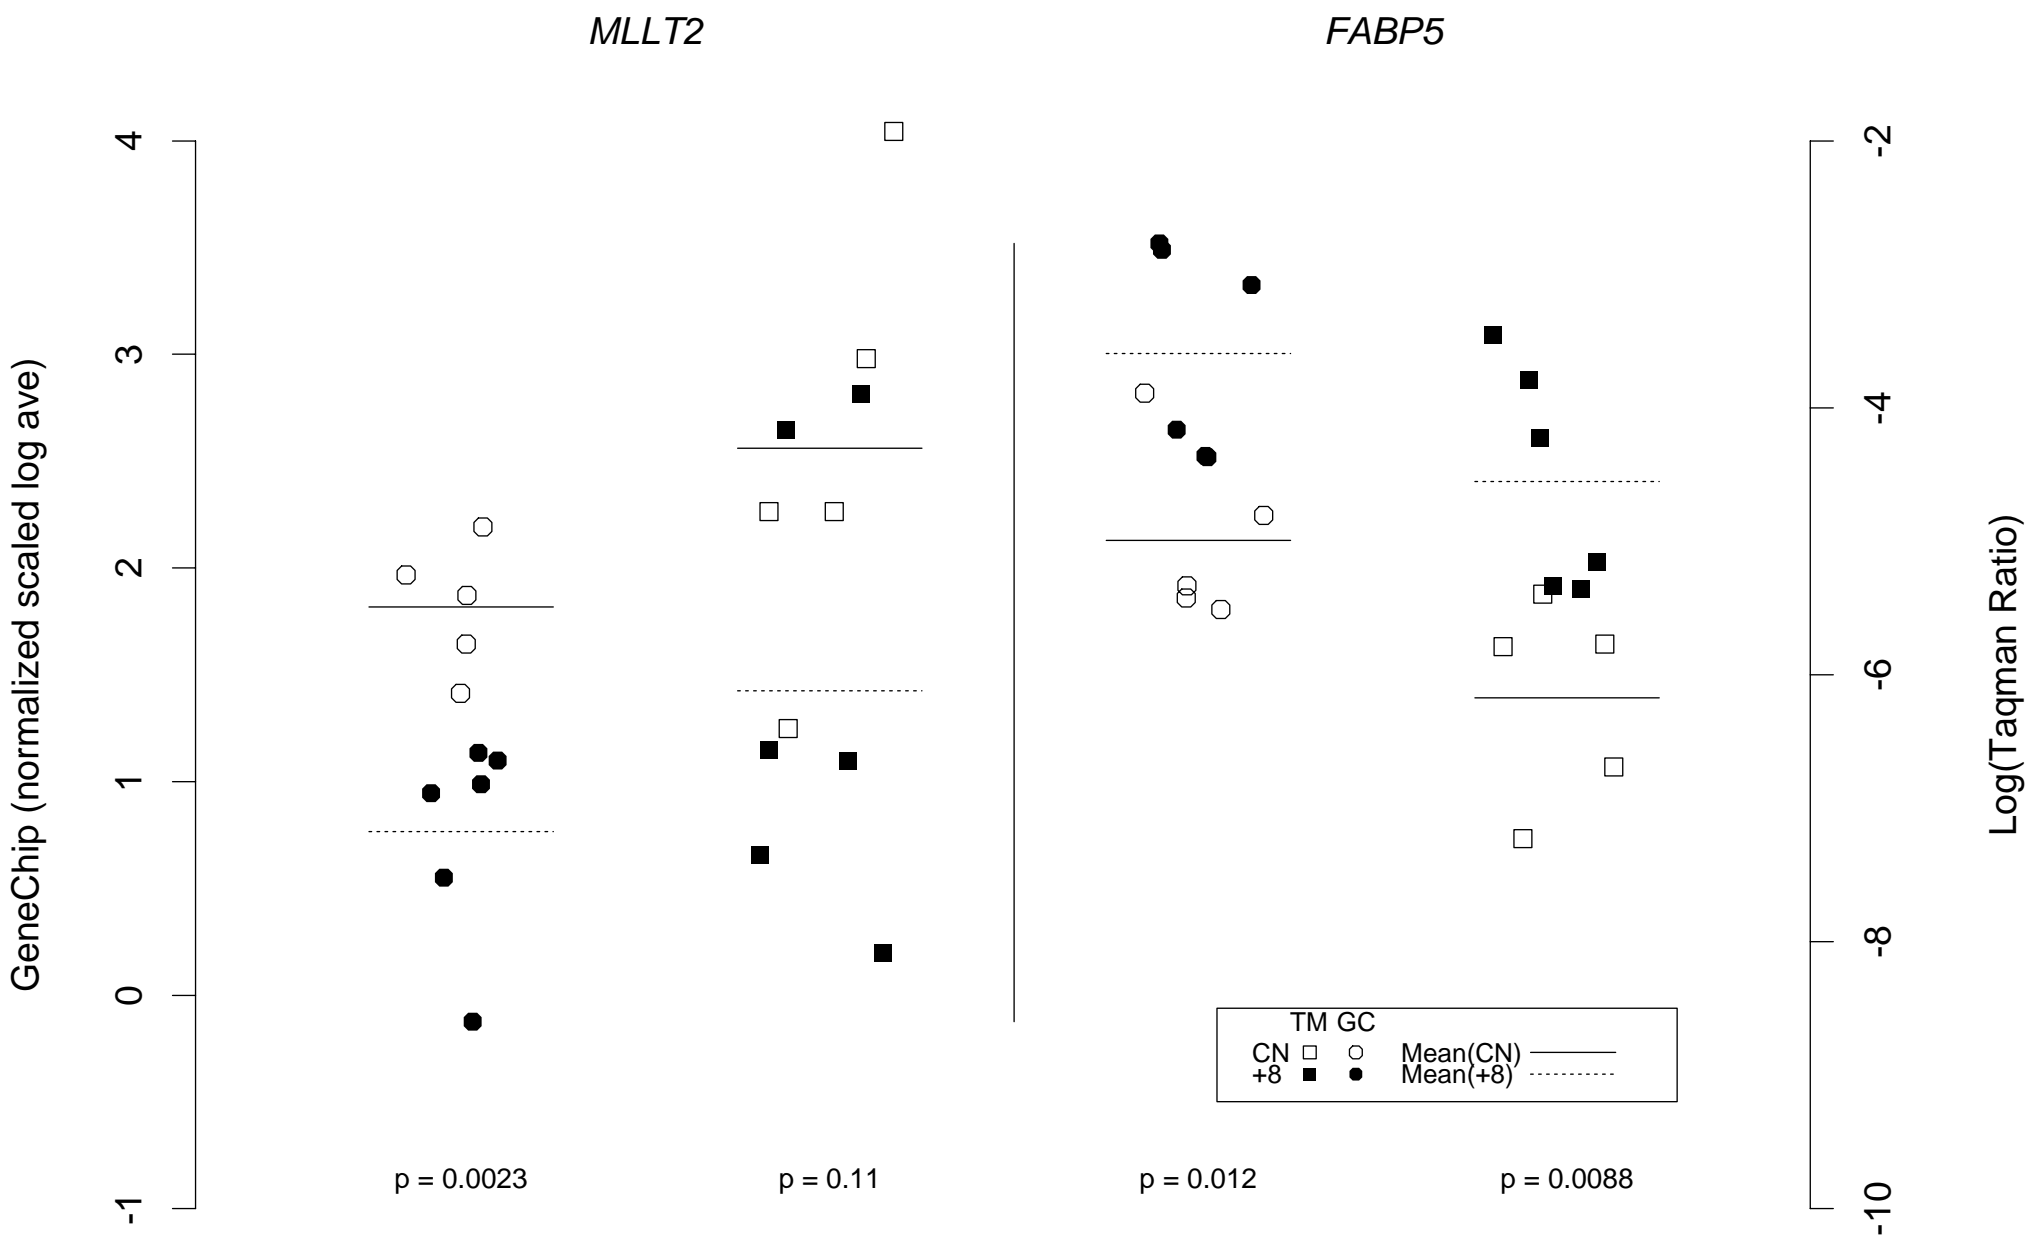

Supplement: pnas_98_3_1124__7.pdf [file pnas_98_3_1124__7.pdf]

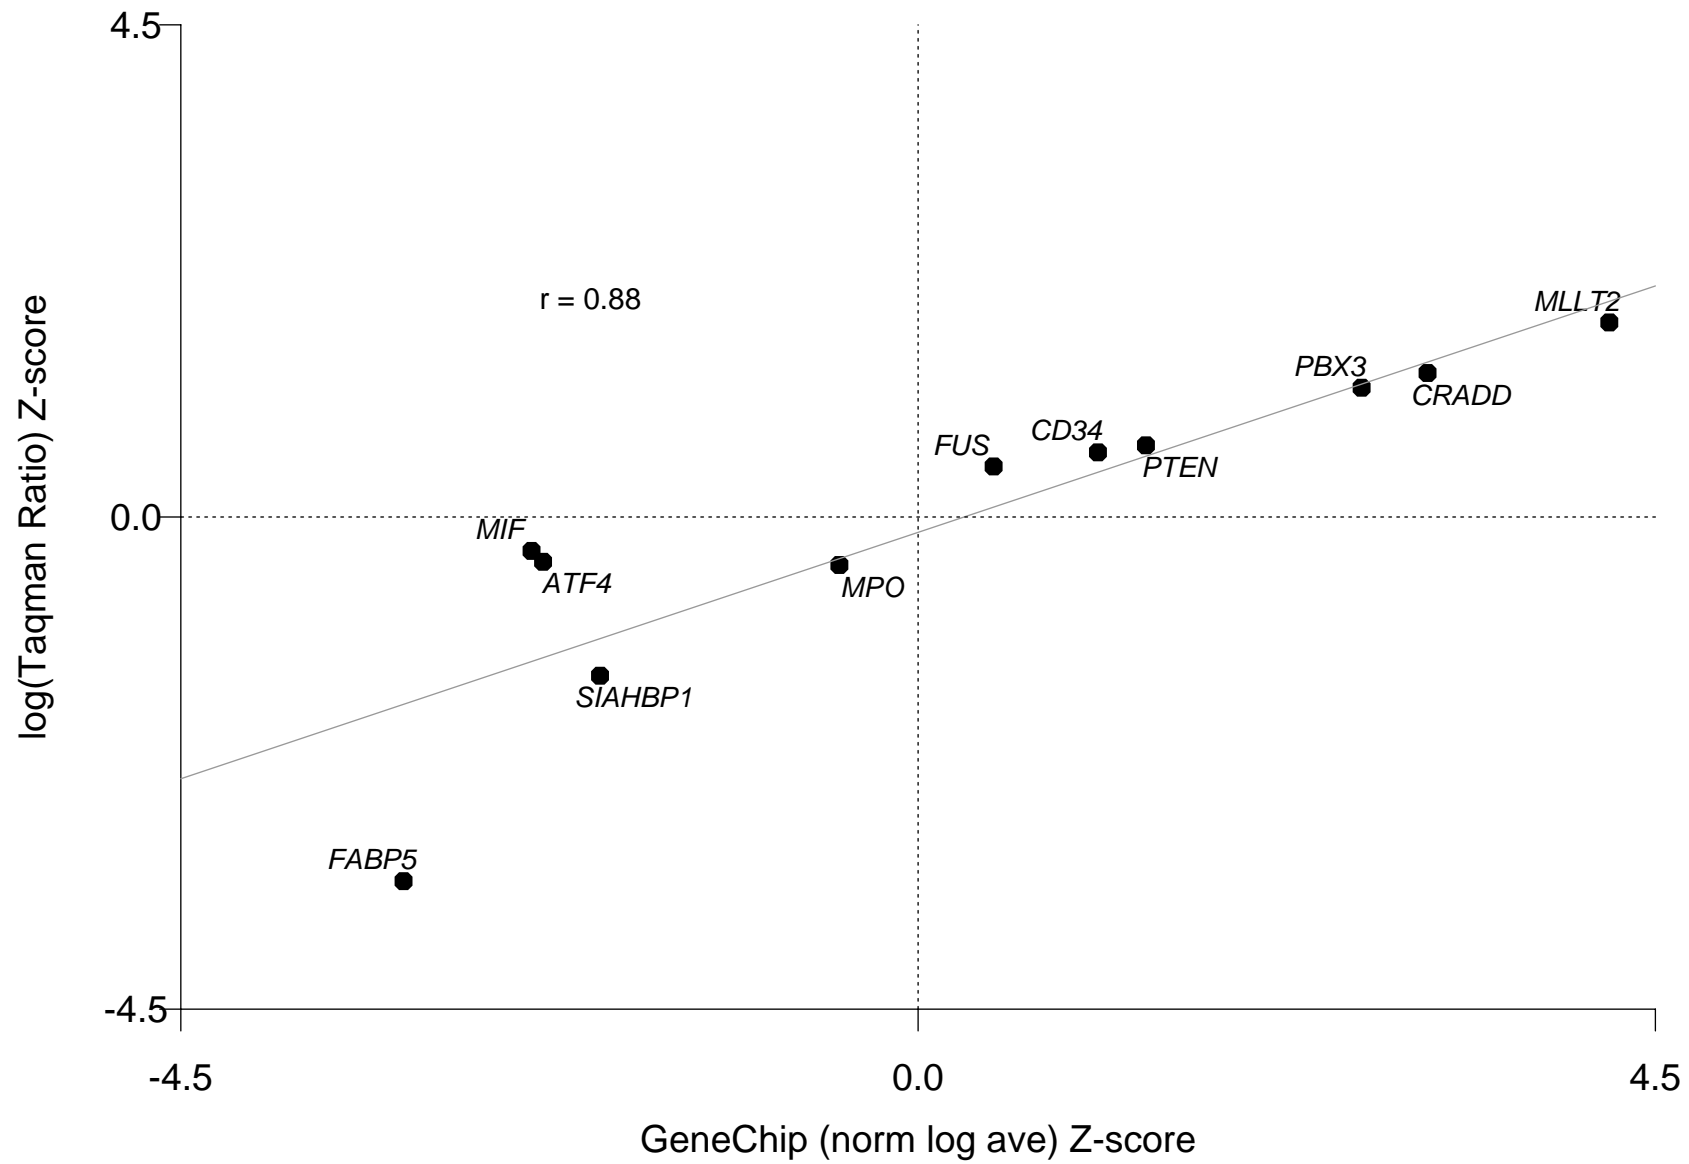

Supplement: pnas_98_3_1124__9.pdf [file pnas_98_3_1124__9.pdf]
